# Supplementary material for: Pyruvate dehydrogenase kinase 4 exhibits a novel role in the activation of mutant KRAS, regulating cell growth in lung and colorectal tumour cells
Source: PubMed Central journal article supplement (PMC5671936; doi:10.1038/onc.2017.224), 2017-07-10

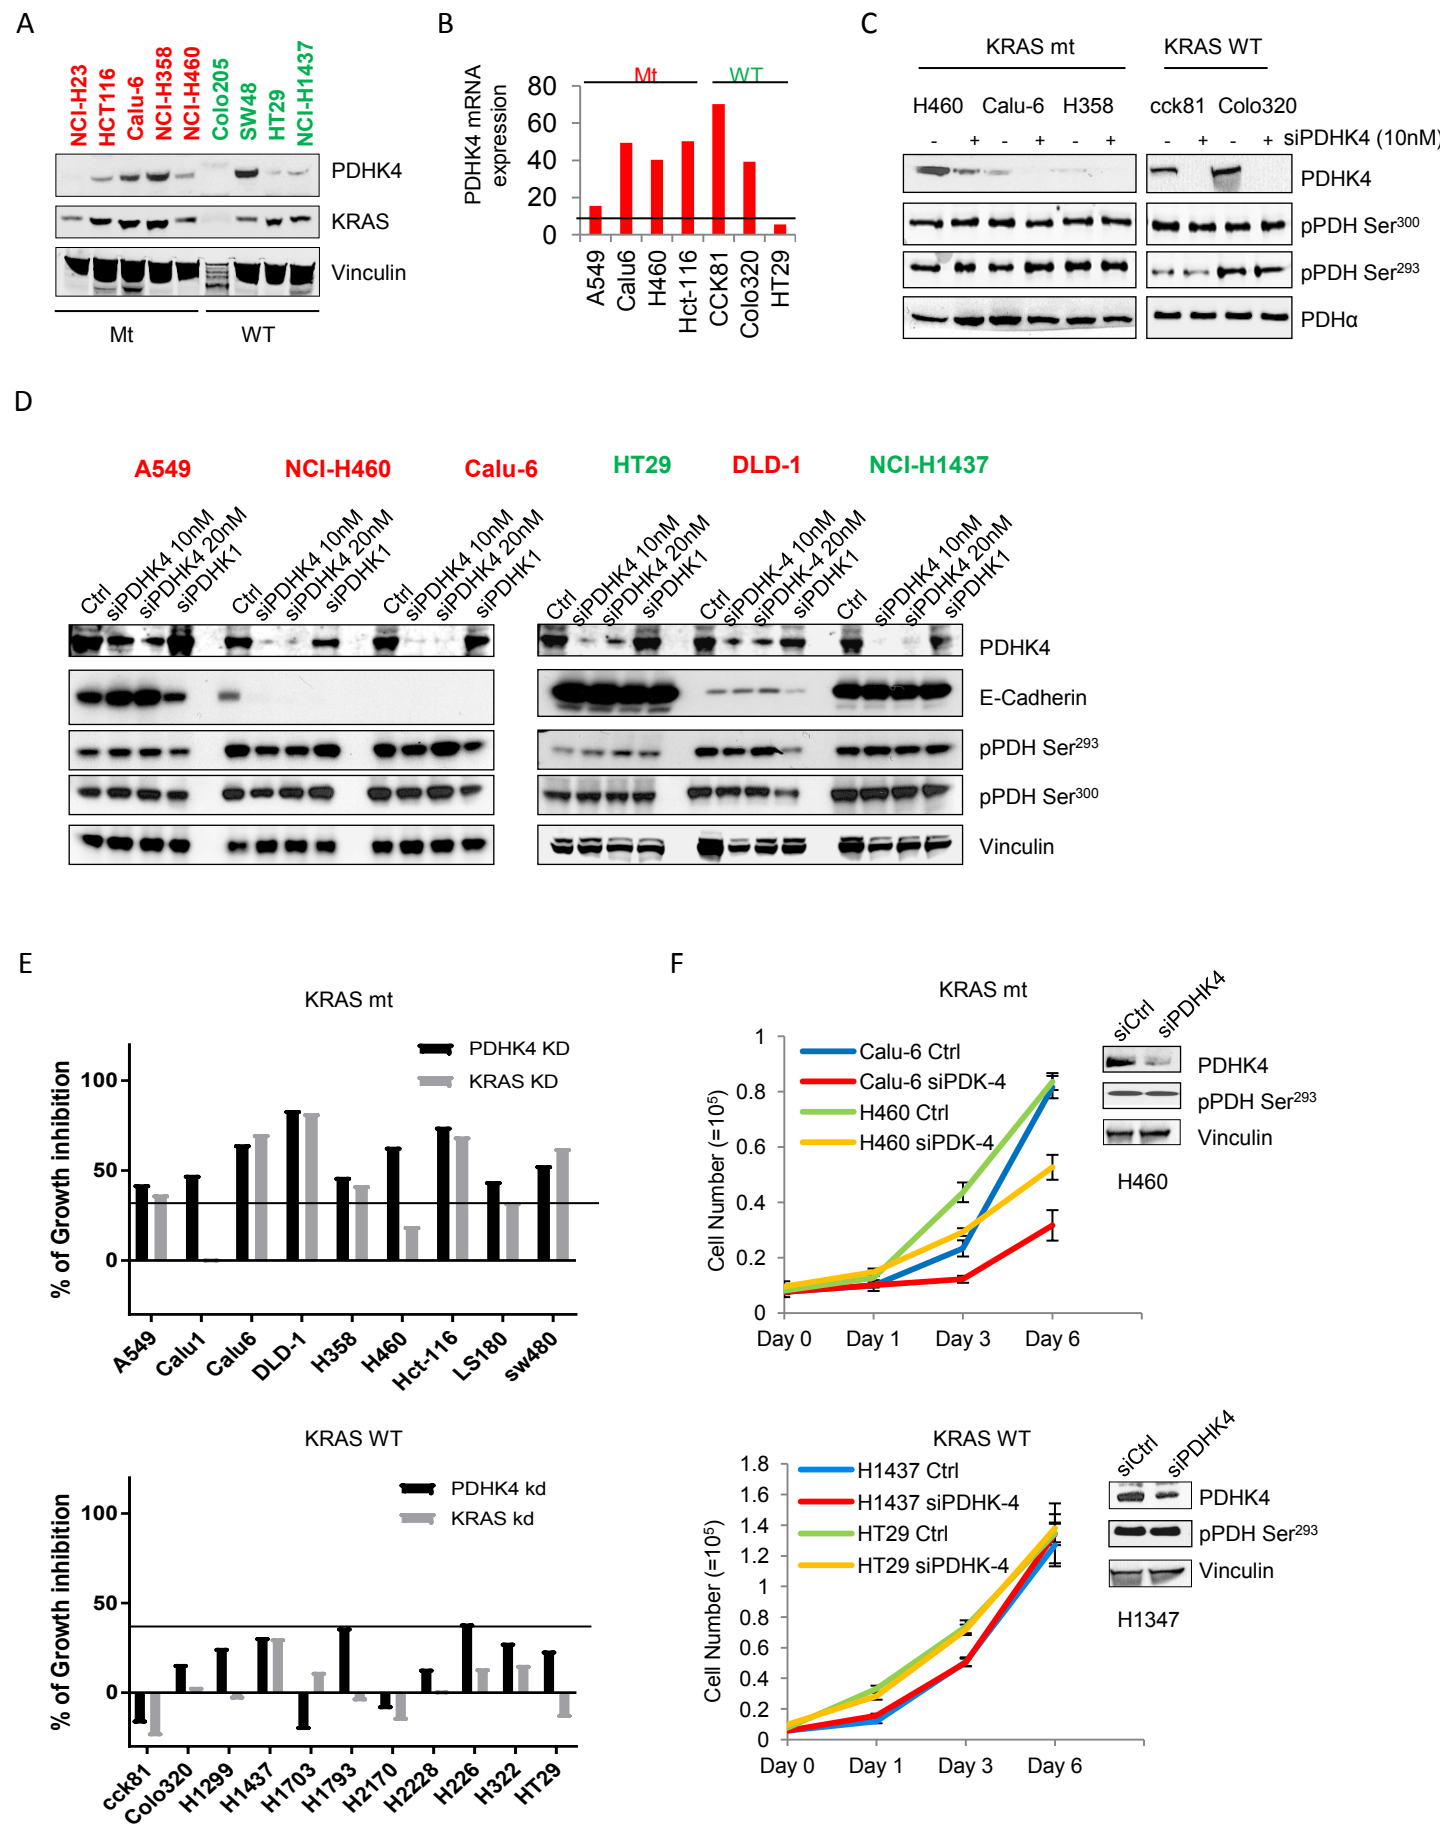

A

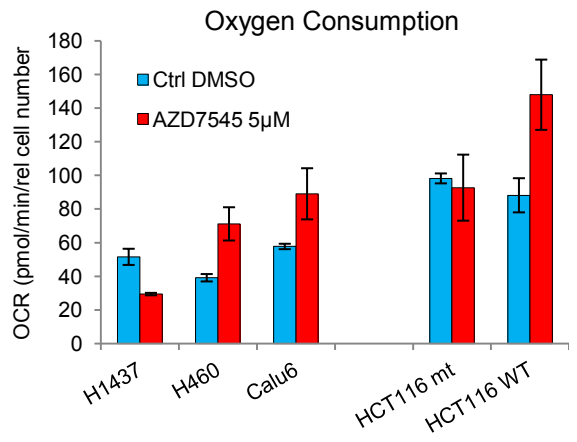

B

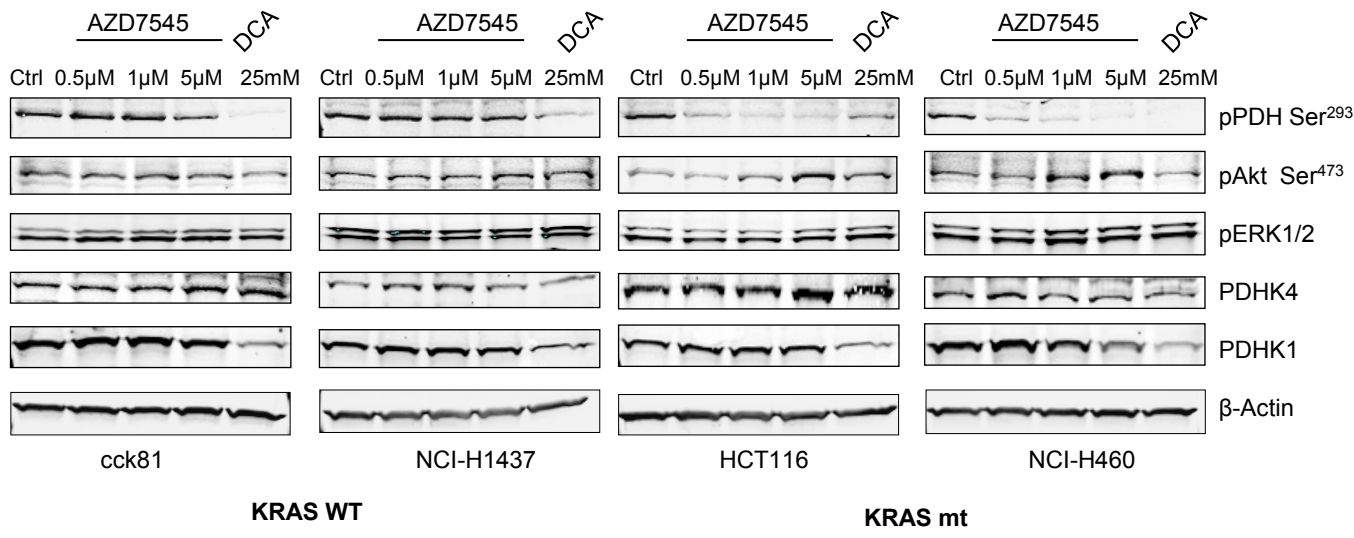

A

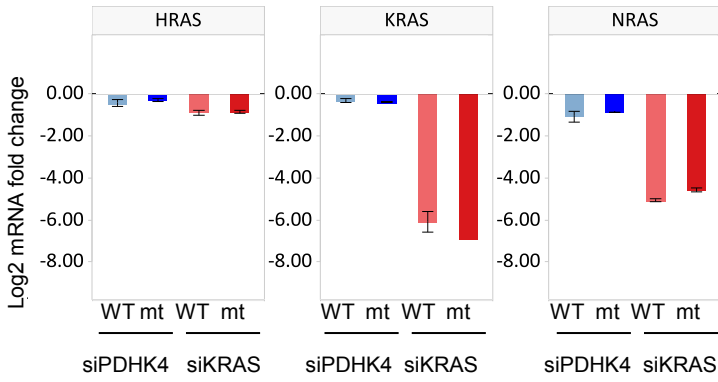

B

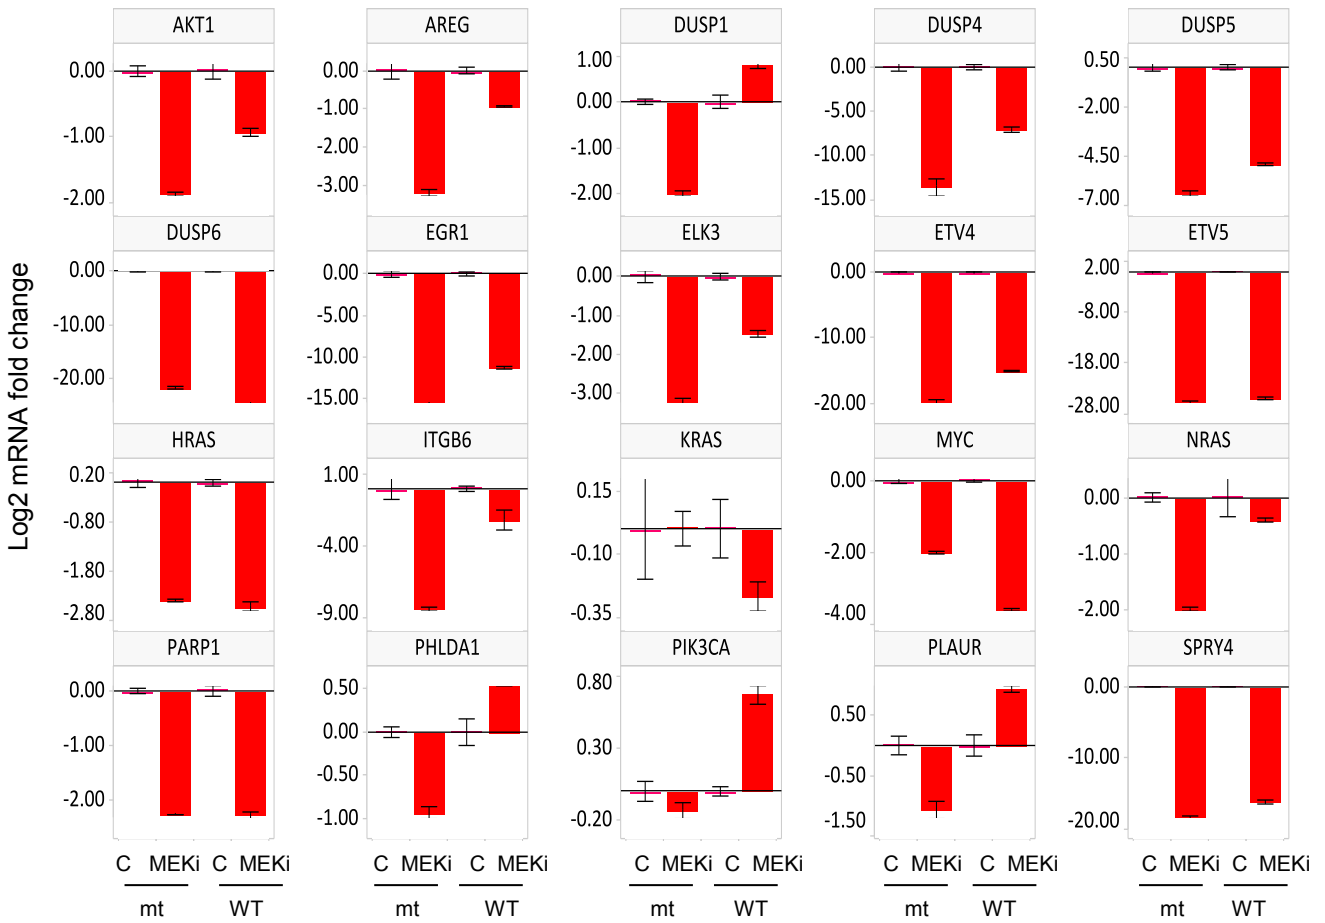

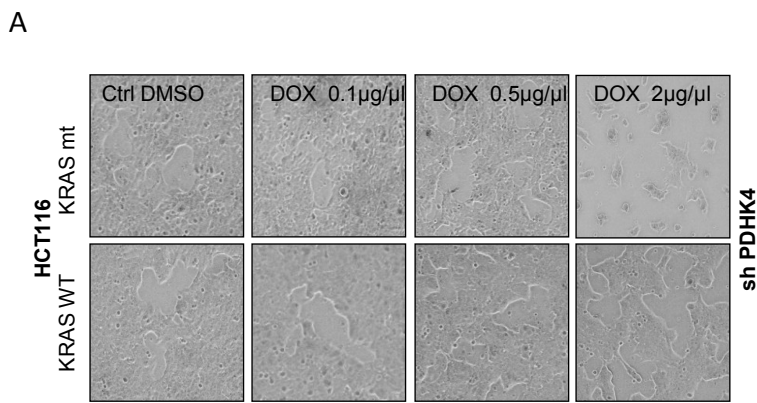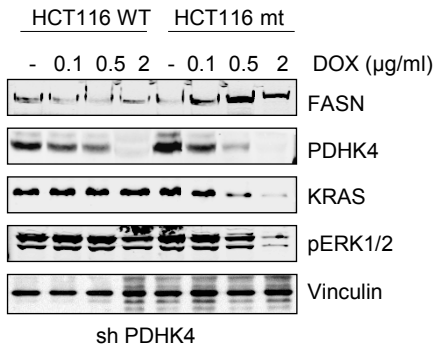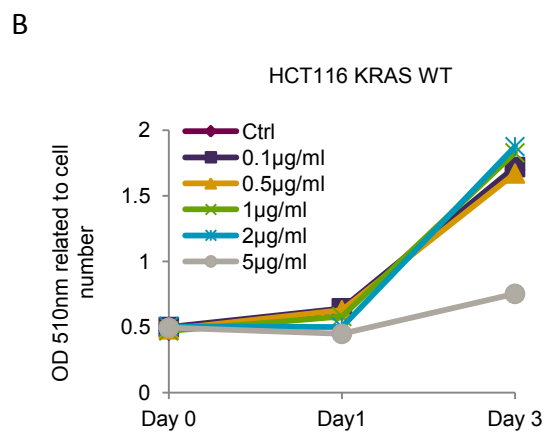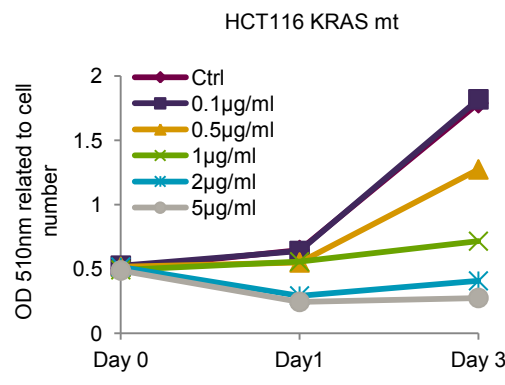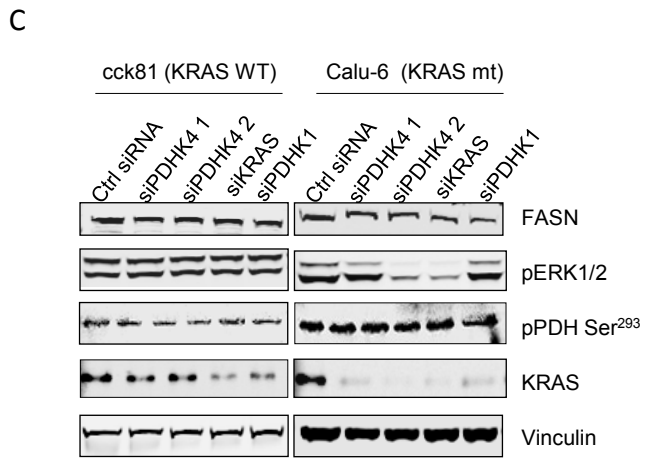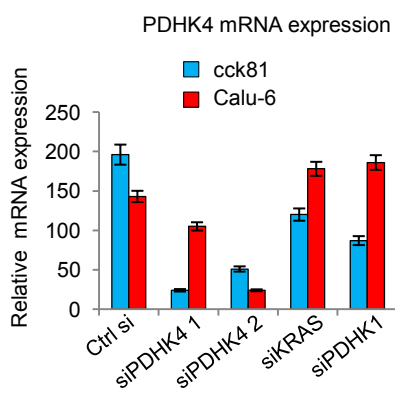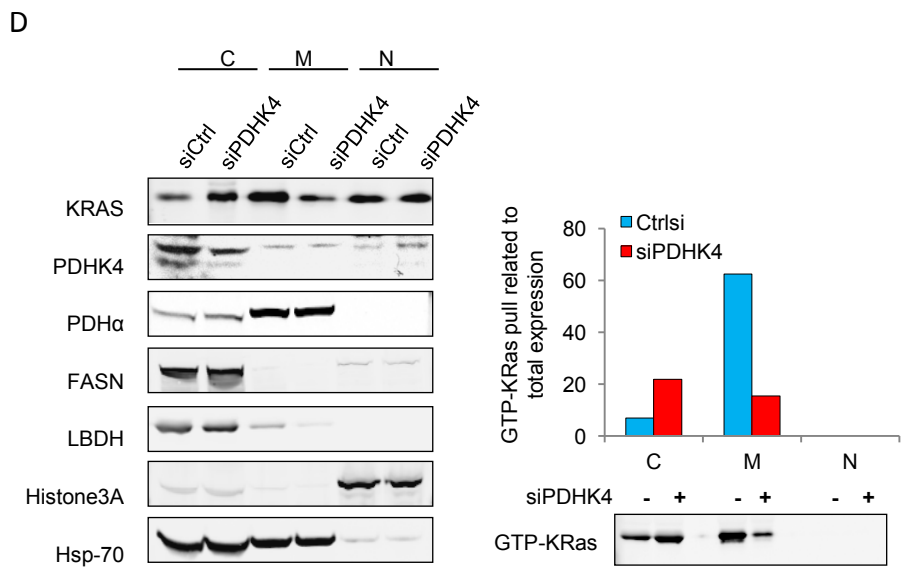

Supplementary Figure 4

A

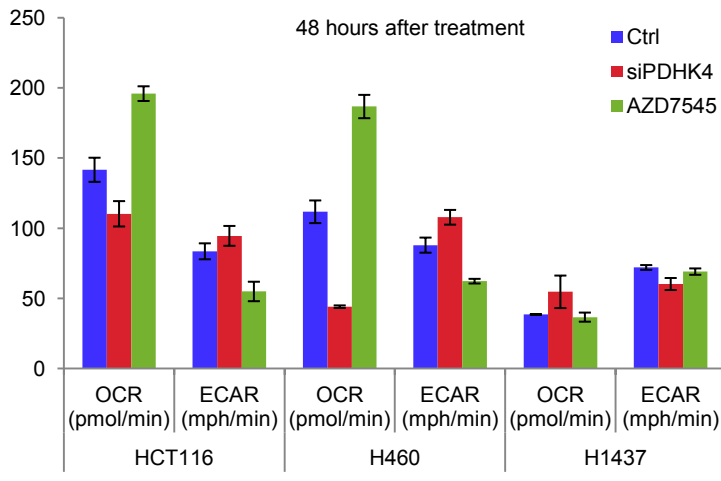

C

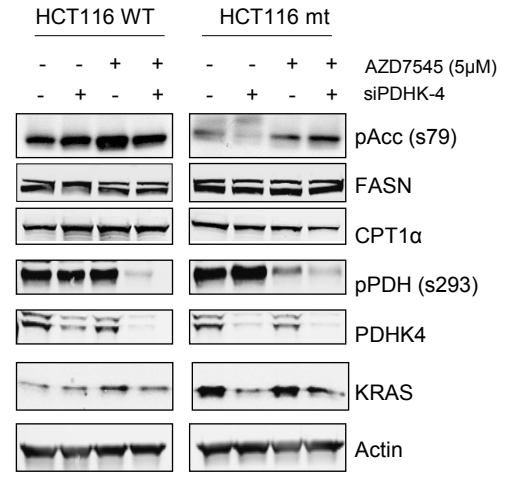

B

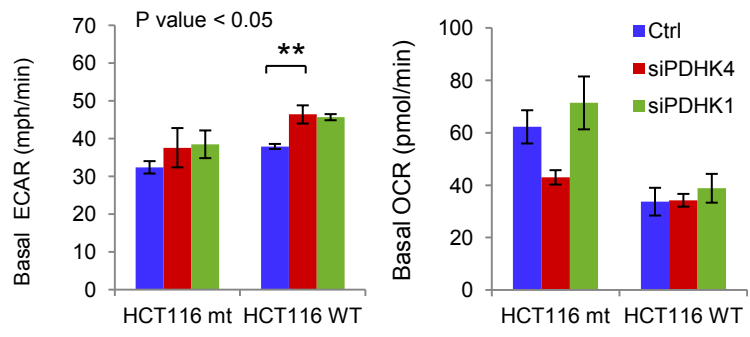

D

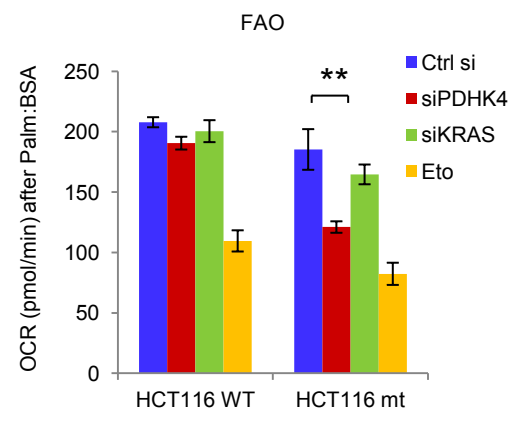

E

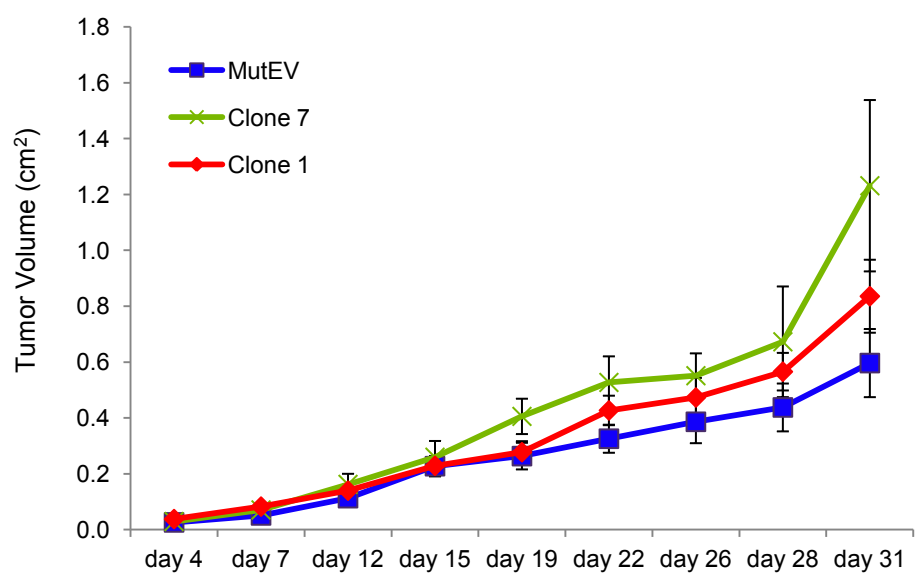

Supplement: onc2017224x1.pdf [file onc2017224x1.pdf]
